# Supplementary material for: The effects of amine/nitro/hydroxyl groups on the benzene rings of redox additives on the electrochemical performance of carbon-based supercapacitors
Source: Royal Society of Chemistry journal article supplement (doi:10.1039/c6cp00211k), 2016-01-01
Supplement: c6cp00211k1.pdf [file c6cp00211k1.pdf]

## Supporting Information

**Efficient improvement of electrochemical performance towards the carbon-based supercapacitors simply by introducing redox additives especially incurred by the effects of amine/nitro/hydroxyl groups adhering to the phenyl rings**

Xuan Huang<sup>1</sup>, Xiang Ying Chen<sup>1\*</sup>, and Zhong Jie Zhang<sup>2\*\*</sup>

*<sup>1</sup>School of Chemistry and Chemical Engineering, Anhui Key Laboratory of Controllable Chemistry Reaction & Material Chemical Engineering, Hefei University of Technology, Hefei, Anhui 230009, P. R. China. \*Corresponding author. Tel./Fax: +86-551-62901450. E-mail: [cxyhfut@gmail.com](mailto:cxyhfut@gmail.com).*

*<sup>2</sup>College of Chemistry & Chemical Engineering, Anhui Province Key Laboratory of Environment-friendly Polymer Materials, Anhui University, Hefei 230039, Anhui, P. R. China. \*\* Also the corresponding author. E-mail: [zhangzj0603@126.com](mailto:zhangzj0603@126.com).*

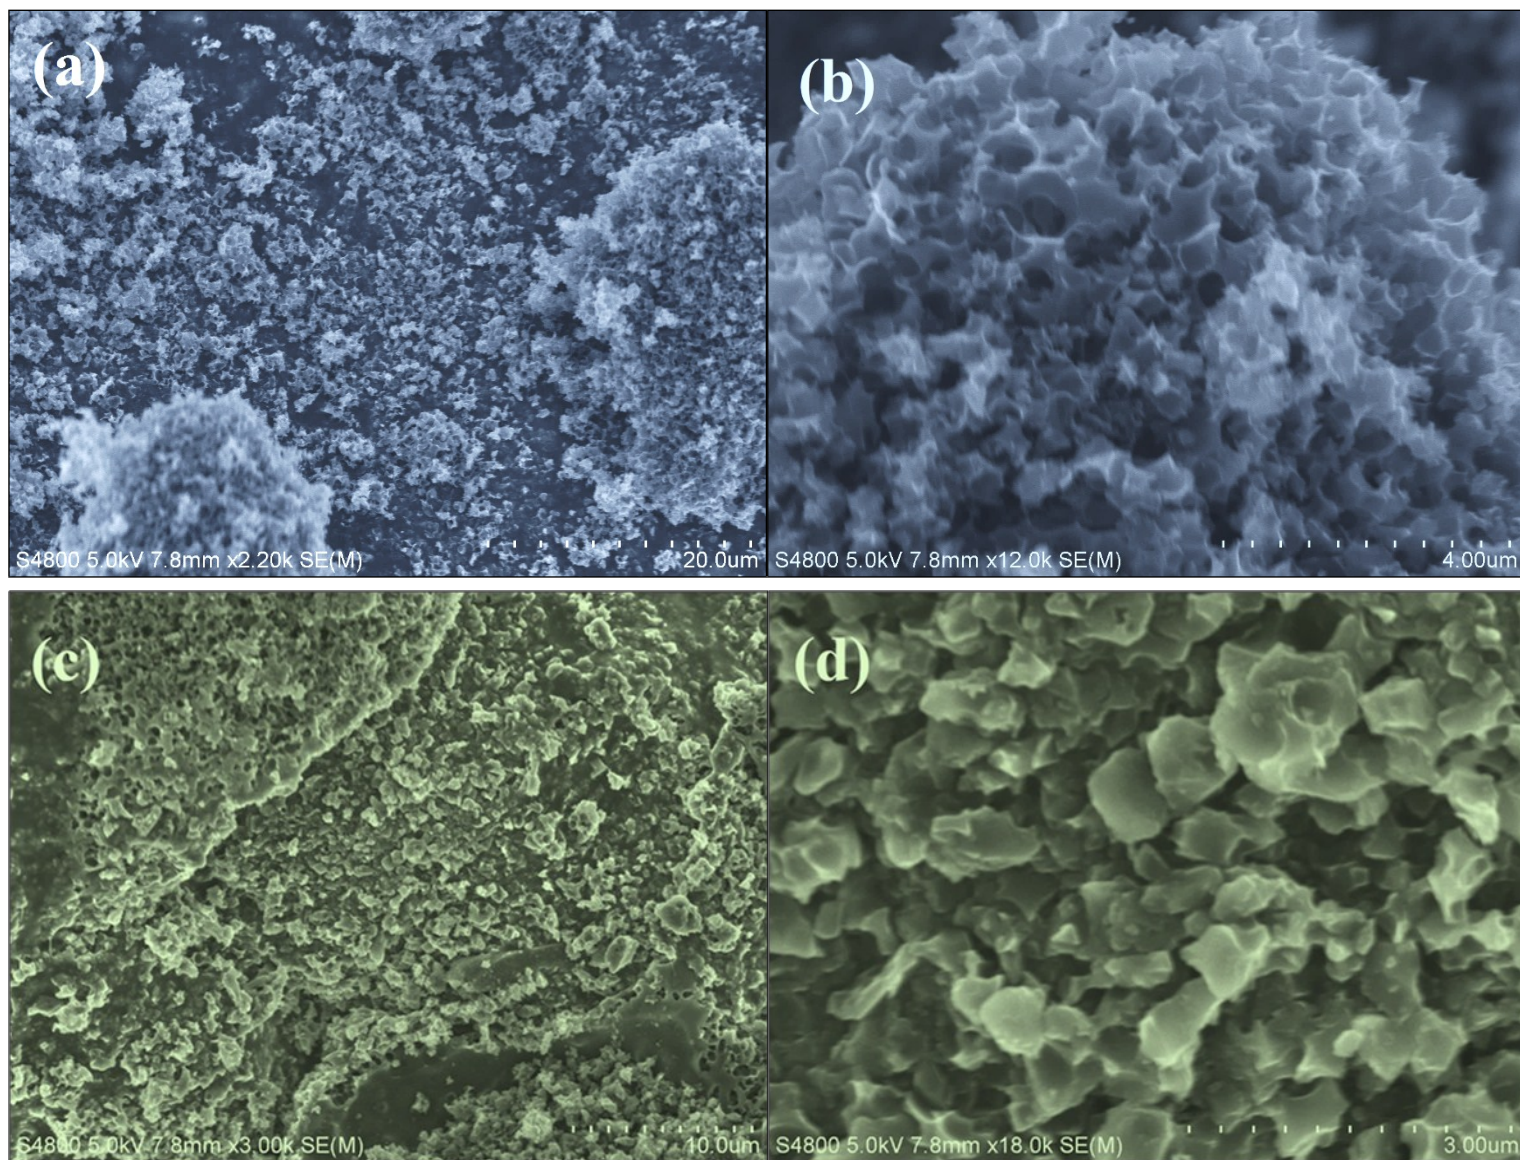

**Fig. S1.** FESEM: (a-b) **carbon-1:1**; (c-d) **carbon-2:1**

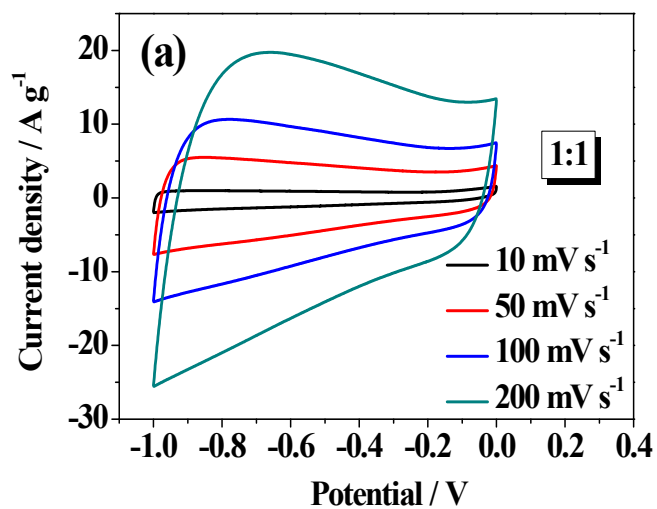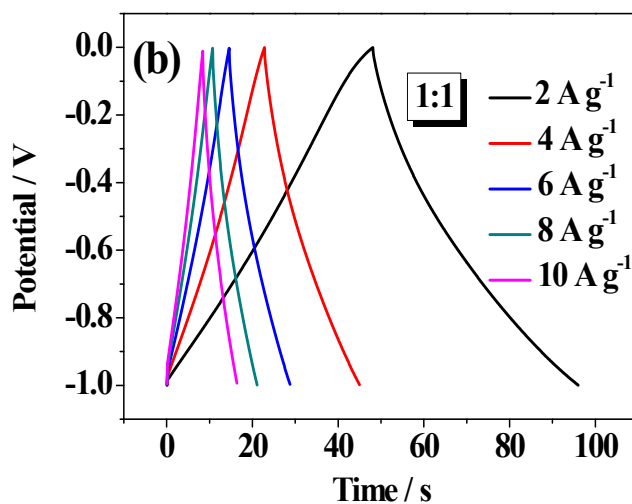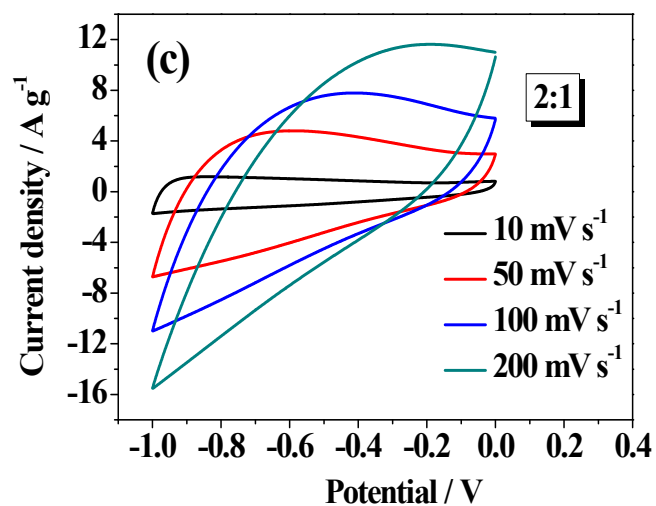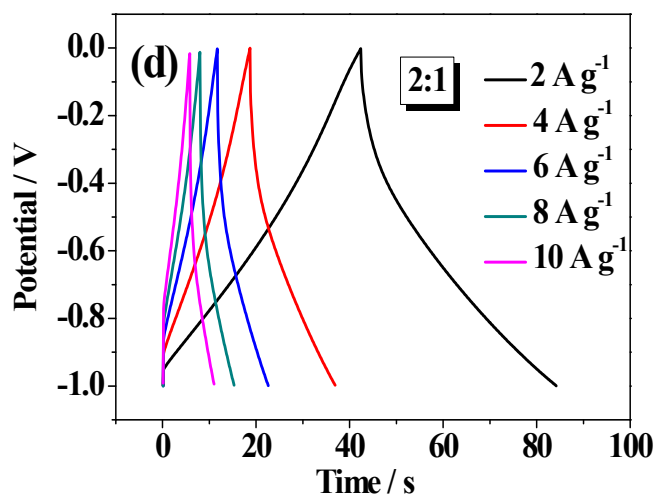

**Fig. S2.** The **carbon-1:1** sample: (a) CV curves at different scan rates; (b) GCD curves at different current densities. The **carbon-2:1** sample: (c) CV curves at different scan rates; (d) GCD curves at different current densities.

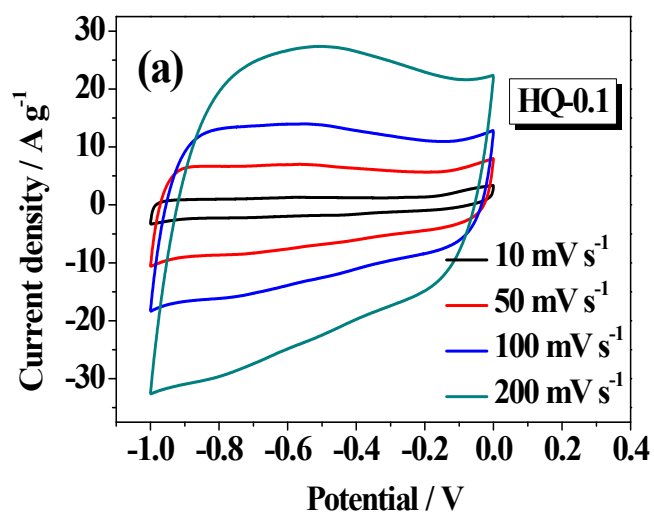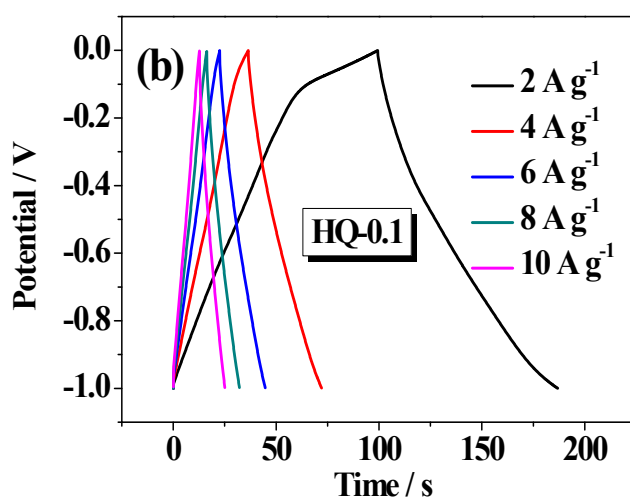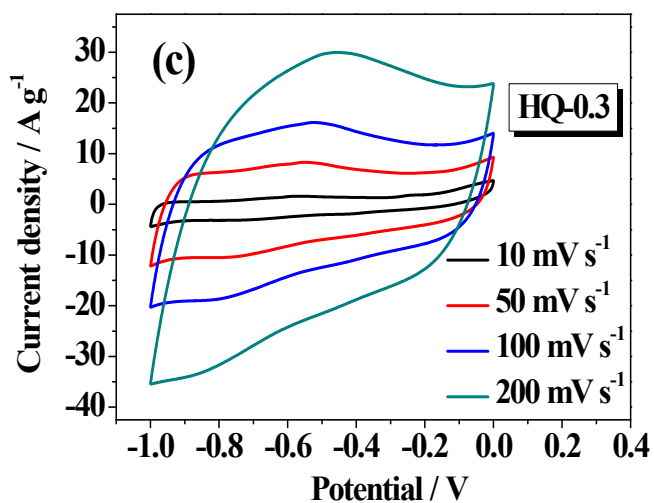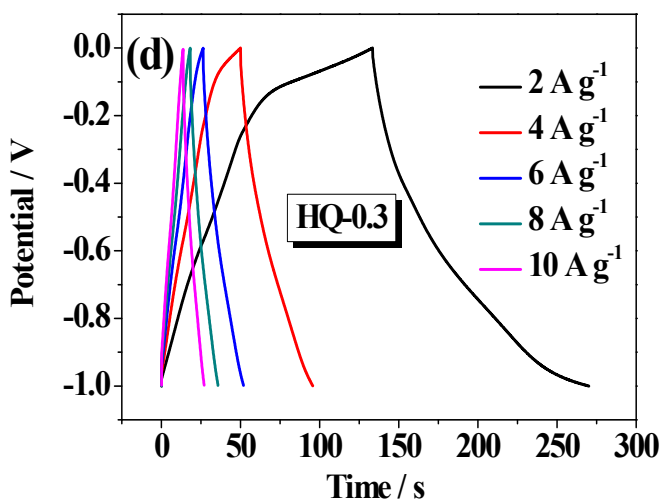

**Fig. S3.** The carbon-1:2 sample measured in the HQ-0.1/0.3 electrolytes: (a, c) CV curves at different scan rates; (b, d) GCD curves at different current densities.

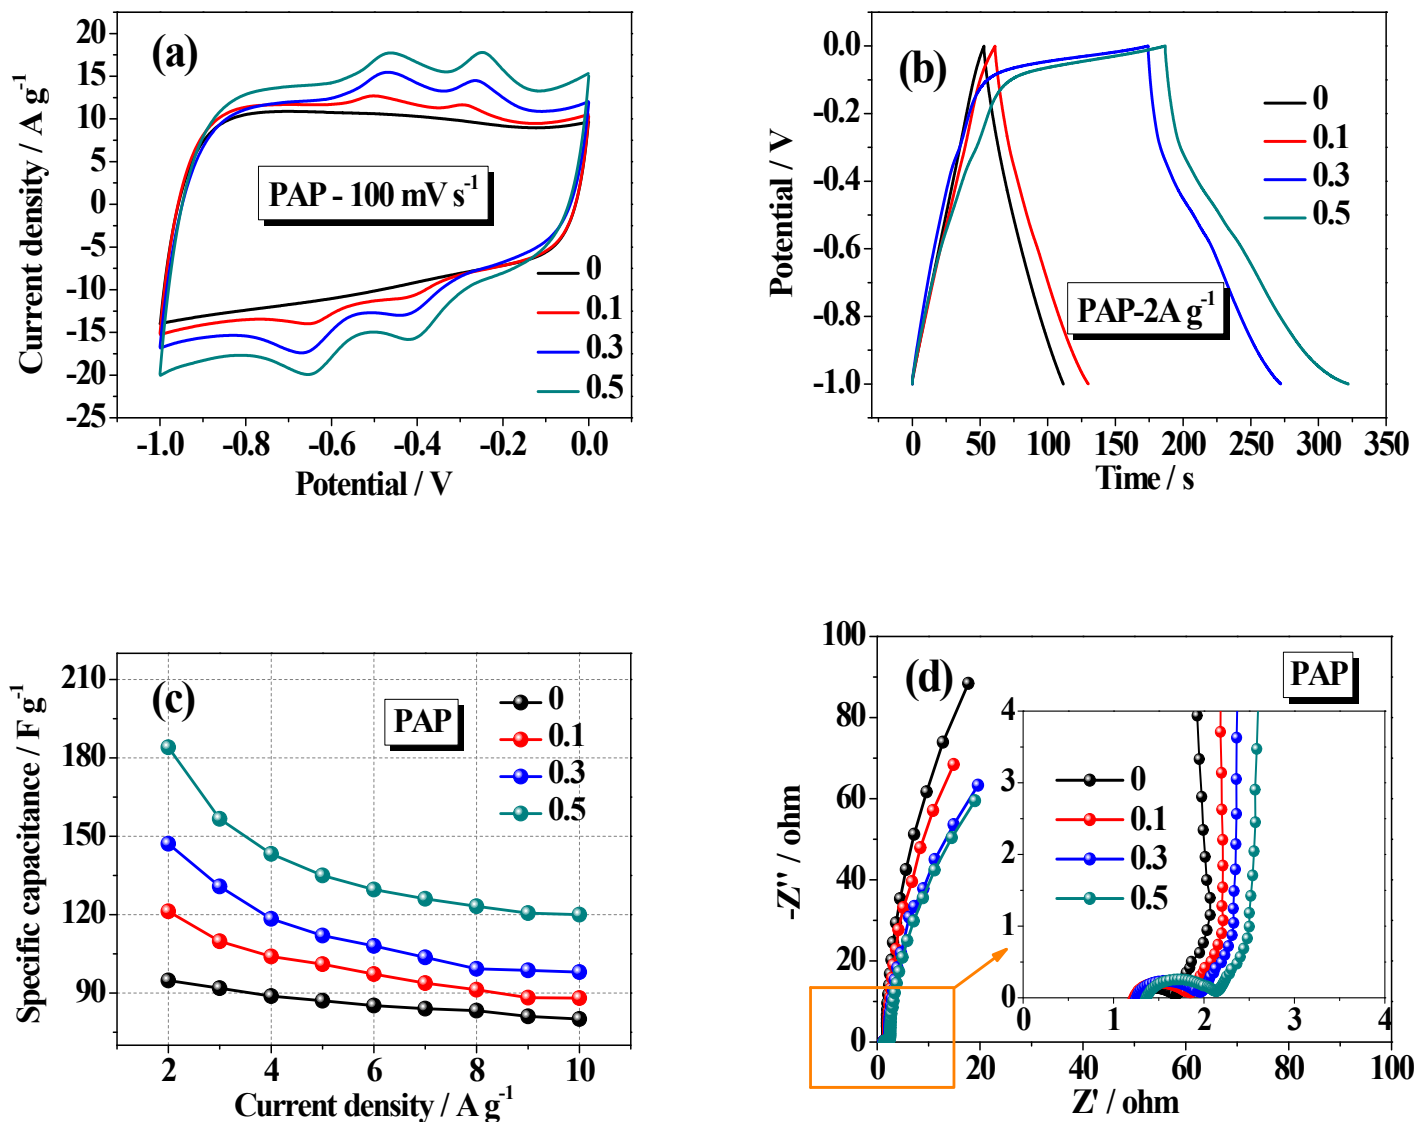

**Fig. S4.** The carbon-1:2 sample measured in the PAP-0/0.1/0.3/0.5 electrolytes: (a) CV curves at a scan rate of  $100 \text{ mV s}^{-1}$ ; (b) GCD curves at a current density of  $2 \text{ A g}^{-1}$ ; (c) specific capacitances calculated from GCD curves; (d) Nyquist plots and the partial magnified Nyquist plots.

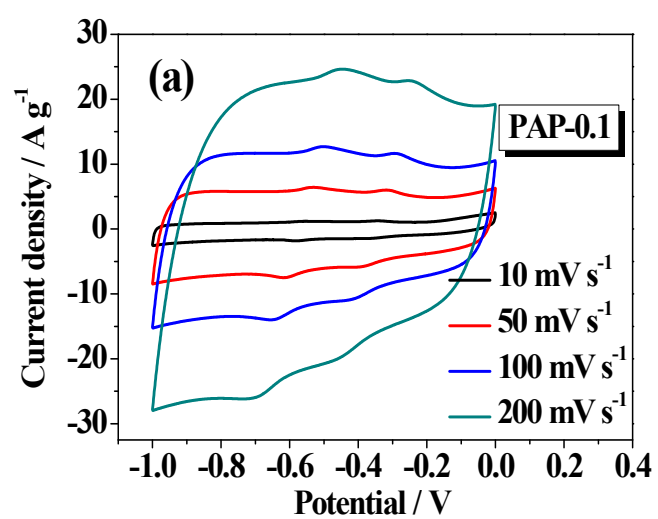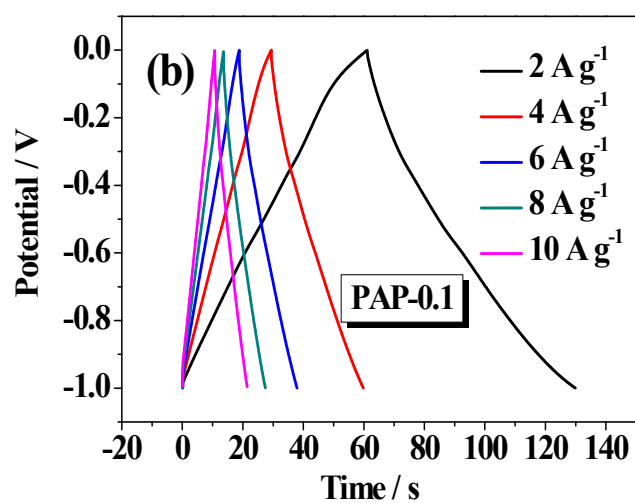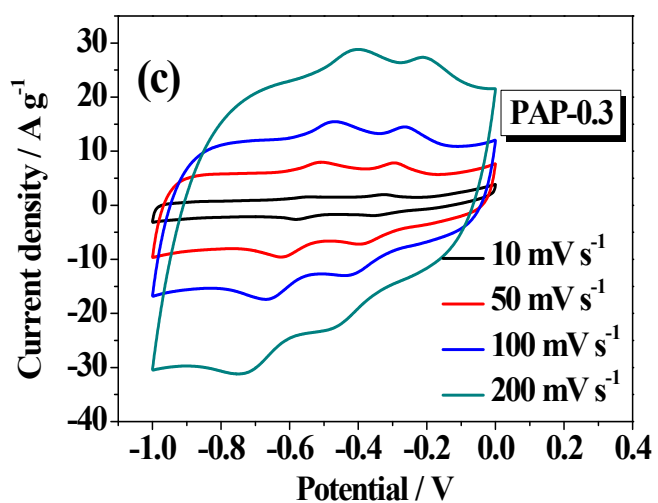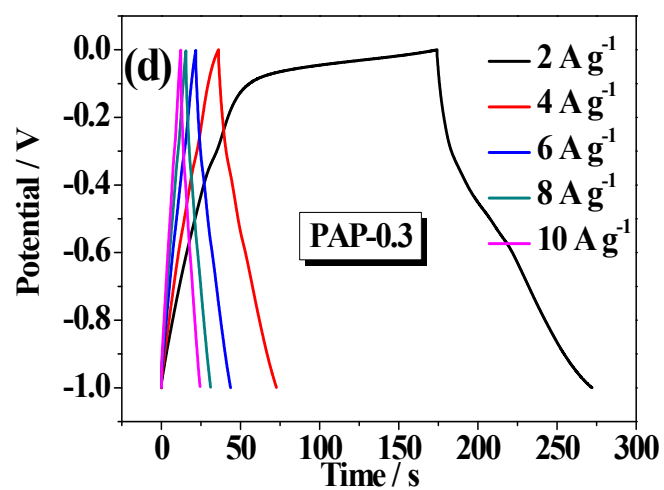

**Fig. S5.** The carbon-1:2 sample measured in the PAP-0.1/0.3 electrolytes: (a, c) CV curves at different scan rates; (b, d) GCD curves at different current densities.

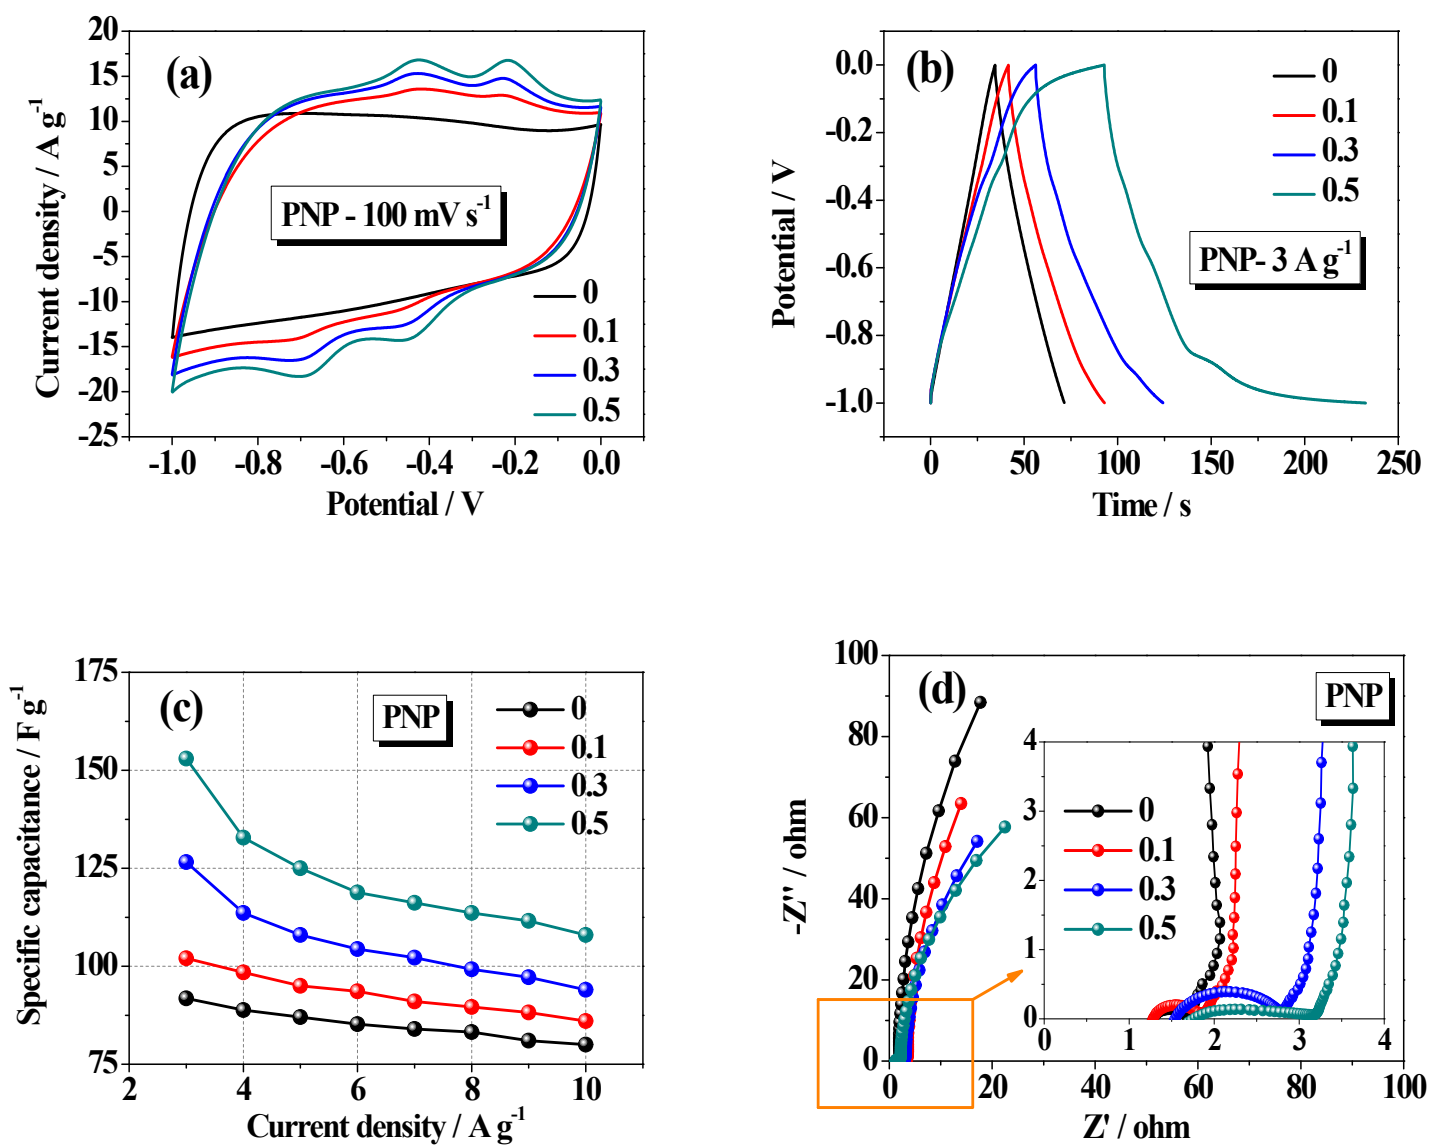

**Fig. S6.** The carbon-1:2 sample measured in the PNP-0/0.1/0.3/0.5 electrolytes: (a) CV curves at a scan rate of  $100 \text{ mV s}^{-1}$ ; (b) GCD curves at a current density of  $3 \text{ A g}^{-1}$ ; (c) specific capacitances calculated from GCD curves; (d) Nyquist plots and the partial magnified Nyquist plots.

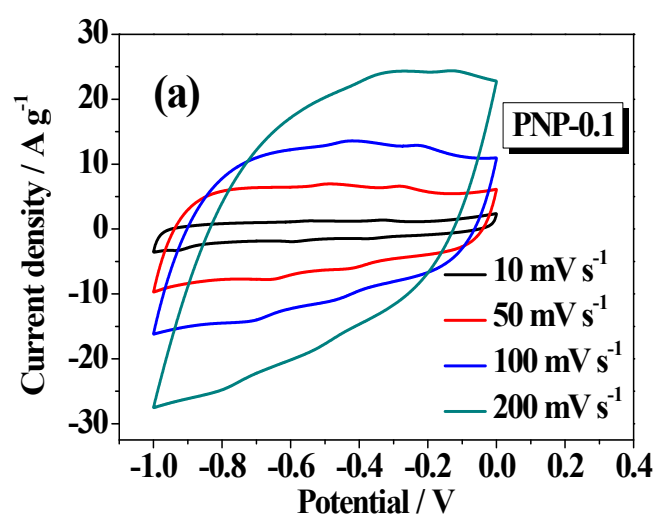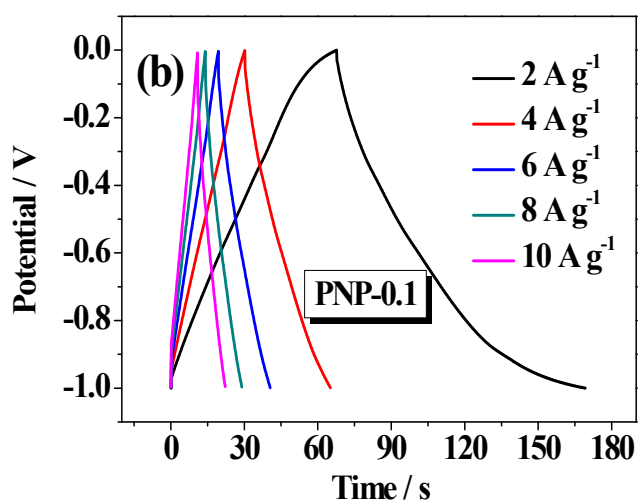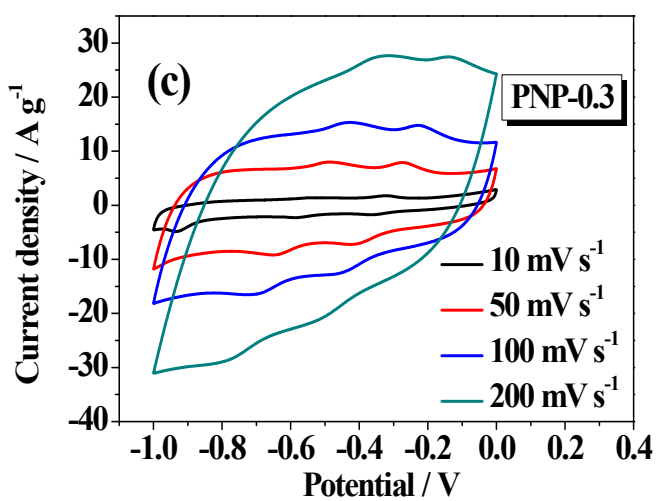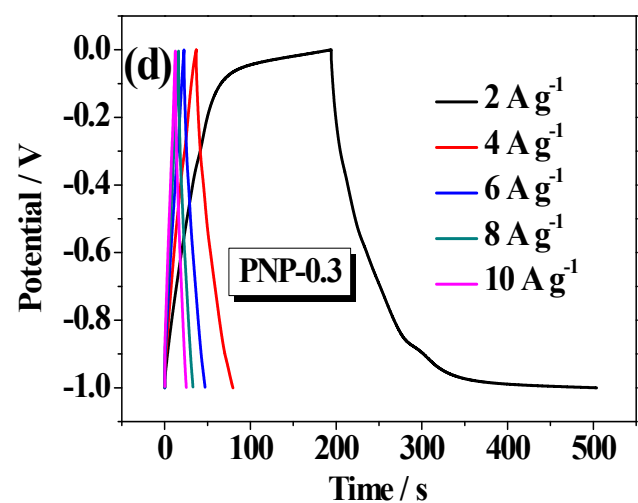

**Fig. S7.** The carbon-1:2 sample measured in the PNP-0.1/0.3 electrolytes: (a, c) CV curves at different scan rates; (b, d) GCD curves at different current densities.



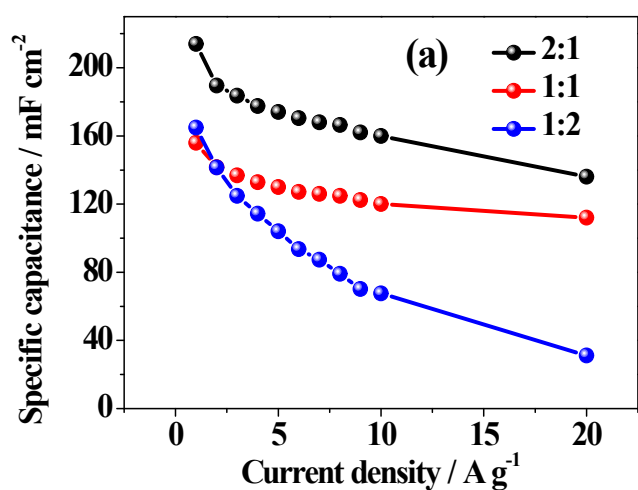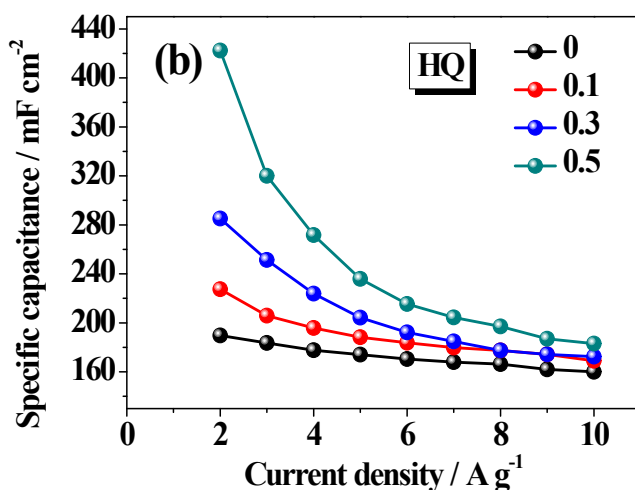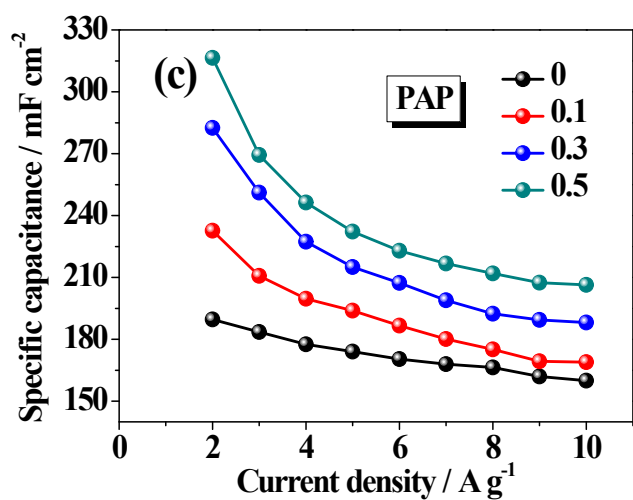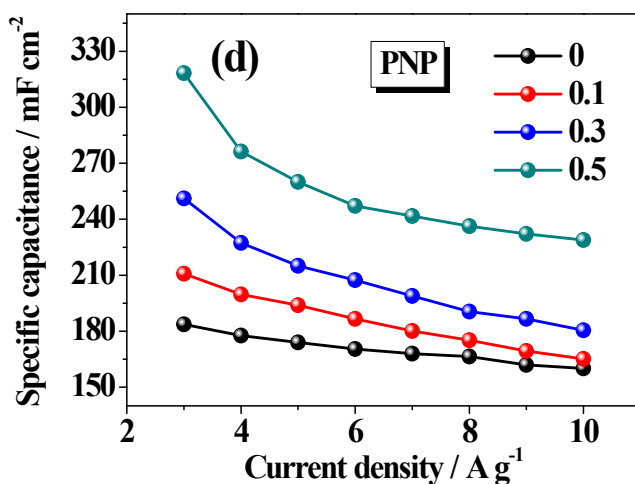

**Fig. S8.** (a) The area normalized capacitance of three kinds of carbon sample measured in KOH electrolyte; (b-d) the area normalized capacitance of carbon-1:2 sample measured in **HQ/PAP/PNP-0.1/0.3/0.5** electrolyte.
